# Supplementary material for: Near-infrared photoluminescence enhancement of N-acetyl-l-cysteine (NAC)-protected gold nanoparticles via fluorescence resonance energy transfer from NAC-stabilized CdTe quantum dots
Source: Royal Society of Chemistry journal article supplement (doi:10.1039/c6ra18456a), 2016-01-01
Supplement: c6ra18456a1.pdf [file c6ra18456a1.pdf]

## Electronic Supplementary Information

### Near-infrared photoluminescence enhancement of *N*-Acetyl-L-Cysteine (NAC)-protected gold nanoparticles *via* fluorescence resonance energy transfer from NAC-stabilized CdTe quantum dots

Yang Liu,<sup>a</sup> Xiaojuan Gong,<sup>a</sup> Zhe Cheng,<sup>a</sup> Shaomin Shuang,<sup>a</sup> Martin M.F. Choi,<sup>b</sup> Chenzhong Li<sup>c</sup> and Chuan Dong<sup>a\*</sup>

<sup>a</sup>*Institute of Environmental Science, and School of Chemistry and Chemical Engineering, Shanxi University, Taiyuan 030006, China. Fax: +86-351-7018613; Tel: +86-351-7018613; E-mail: dc@sxu.edu.cn*

<sup>b</sup>*Present address: Acadia Divinity College, Acadia University, 15 University Avenue, Wolfville, Nova Scotia, B4P 2R6 (Canada)*

<sup>c</sup>*Department of Biomedical Engineering, Florida International University, Miami, Florida 33174, USA*

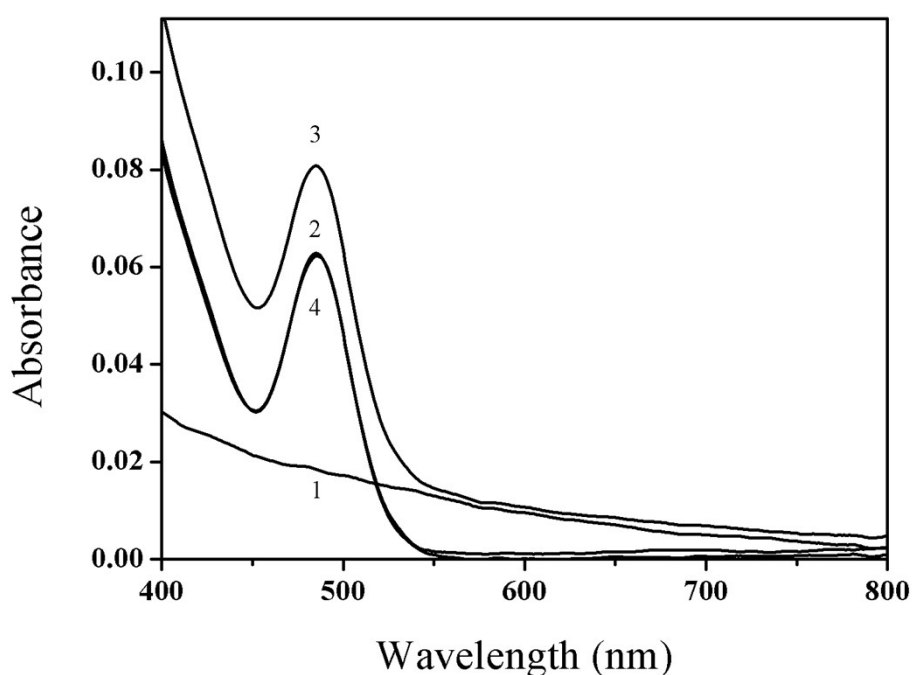

**Fig. S1** Absorption of 0.01 mg/mL 2.4 nm Au NPs (peak 1) and absorption comparison of  $1.25 \times 10^{-4}$  mol/L green CdTe QDs (peak 2) to ( $1.25 \times 10^{-4}$  mol/L green CdTe QDs + 0.01 mg/mL 2.4 nm Au NPs) mixture (peak 3) and to mixture of ( $1.25 \times 10^{-4}$  mol/L green CdTe QDs + 0.01 mg/mL 2.4 nm Au NPs) after subtraction of spectrum of 0.01 mg/mL 2.4 nm Au NPs absorption (peak 4).

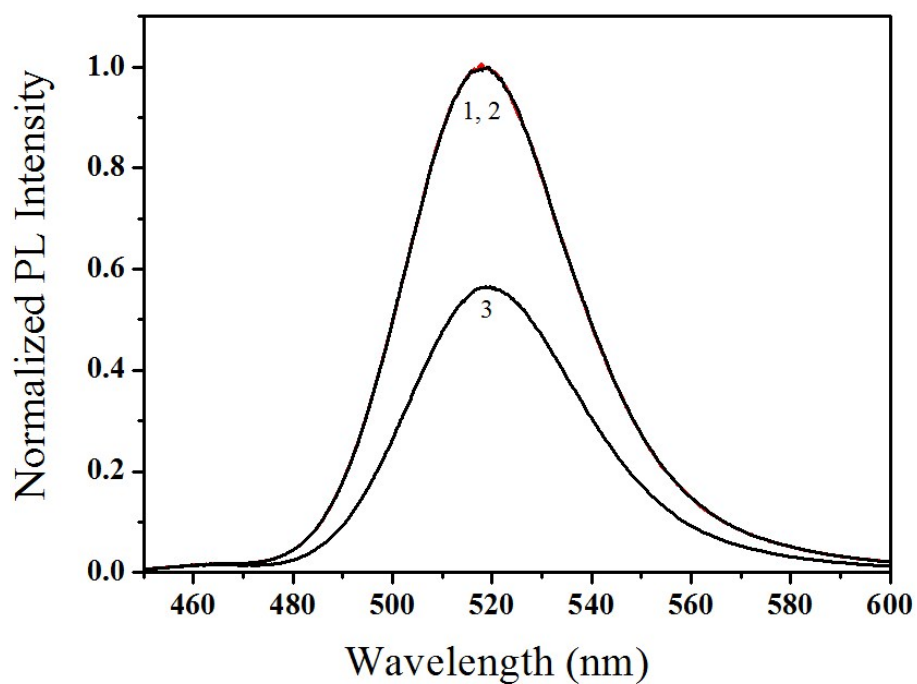

**Fig. S2** Fluorescence spectra of two simultaneous solutions in two paratactic quartz cells: green CdTe QDs ( $1.25 \times 10^{-5}$  mol/L) solution and blank 0.1 mol/L PBS (peak 1), CdTe ( $1.25 \times 10^{-5}$  mol/L) solution and 2.4 nm Au NPs ( $0.5 \times 10^{-3}$  mg/mL) solution in PBS (peak 2) and (green CdTe QDs and 2.4 nm Au NPs ) mixture and Au NPs solution (peak 3).
